# Supplementary material for: Antimicrobial sesterterpenoids with a unique 5/8/6/5 tetracyclic carbon-ring-system and diepoxide polyketides from a deep sea-sediment-sourced fungus Chaetomium globosum SD-347
Source: Royal Society of Chemistry journal article supplement (doi:10.1039/d4ob00449c), 2024-01-01

## Supporting Information

### **Antimicrobial sesterterpenoids with a unique 5/8/6/5 tetracyclic carbon-ring-system and diepoxide polyketides from a deep sea-sediment-sourced fungus *Chaetomium globosum* SD-347**

Xiao-Dong Li,<sup>a,b</sup> Xiao-Ming Li,<sup>a</sup> Bin-Gui Wang,<sup>\*a,c,d</sup> and Xin Li,<sup>\*a,d</sup>

---

<sup>a</sup> CAS and Shandong Province Key Laboratory of Experimental Marine Biology, Center for Ocean Mega-Science, Institute of Oceanology, Chinese Academy of Sciences, Nanhai Road 7, Qingdao 266071, China

<sup>b</sup> Yantai Institute of Coastal Zone Research, Chinese Academy of Sciences, Chunhui Road 17, Yantai 264003, China

<sup>c</sup> University of Chinese Academy of Sciences, Yuquan Road 19A, Beijing 100049, China

<sup>d</sup> Laboratory of Marine Biology and Biotechnology, Qingdao National Laboratory for Marine Science and Technology, Wenhai Road 1, Qingdao 266237, China

## Contents

|                                                                                                                            |    |
|----------------------------------------------------------------------------------------------------------------------------|----|
| Table S1. Crystal Data for compound <b>1</b> .....                                                                         | 3  |
| Table S2. Crystal Data for compound <b>2</b> .....                                                                         | 4  |
| Table S3. Crystal Data for compounds <b>3</b> and <b>4</b> .....                                                           | 5  |
| Figure S1. <sup>1</sup> H NMR Spectrum (500 MHz) of compound <b>1</b> in CDCl <sub>3</sub> .....                           | 6  |
| Figure S2. <sup>13</sup> C NMR Spectrum (125 MHz) of compound <b>1</b> in CDCl <sub>3</sub> .....                          | 6  |
| Figure S3. COSY Spectrum of compound <b>1</b> in CDCl <sub>3</sub> .....                                                   | 7  |
| Figure S4. HSQC Spectrum of compound <b>1</b> in CDCl <sub>3</sub> .....                                                   | 7  |
| Figure S5. HMBC Spectrum of compound <b>1</b> in CDCl <sub>3</sub> .....                                                   | 8  |
| Figure S6. NOESY Spectrum of compound <b>1</b> in CDCl <sub>3</sub> .....                                                  | 8  |
| Figure S7. HRESIMS Spectrum of compound <b>1</b> .....                                                                     | 9  |
| Figure S8. <sup>1</sup> H NMR Spectrum (500 MHz) of compound <b>2</b> in CDCl <sub>3</sub> .....                           | 9  |
| Figure S9. <sup>13</sup> C NMR Spectrum (125 MHz) of compound <b>2</b> in CDCl <sub>3</sub> .....                          | 10 |
| Figure S10. COSY Spectrum of compound <b>2</b> in CDCl <sub>3</sub> .....                                                  | 10 |
| Figure S11. HSQC Spectrum of compound <b>2</b> in CDCl <sub>3</sub> .....                                                  | 11 |
| Figure S12. HMBC Spectrum of compound <b>2</b> in CDCl <sub>3</sub> .....                                                  | 11 |
| Figure S13. NOESY Spectrum of compound <b>2</b> in CDCl <sub>3</sub> .....                                                 | 12 |
| Figure S14. HRESIMS Spectrum of compound <b>2</b> .....                                                                    | 12 |
| Figure S15. <sup>1</sup> H NMR Spectrum (500 MHz) of compounds <b>3</b> and <b>4</b> in DMSO- <i>d</i> <sub>6</sub> .....  | 13 |
| Figure S16. <sup>13</sup> C NMR Spectrum (125 MHz) of compounds <b>3</b> and <b>4</b> in DMSO- <i>d</i> <sub>6</sub> ..... | 13 |
| Figure S17. COSY Spectrum of compounds <b>3</b> and <b>4</b> in DMSO- <i>d</i> <sub>6</sub> .....                          | 14 |
| Figure S18. HSQC Spectrum of compounds <b>3</b> and <b>4</b> in DMSO- <i>d</i> <sub>6</sub> .....                          | 14 |
| Figure S19. HMBC Spectrum of compounds <b>3</b> and <b>4</b> in DMSO- <i>d</i> <sub>6</sub> .....                          | 15 |
| Figure S20. NOESY Spectrum of compounds <b>3</b> and <b>4</b> in DMSO- <i>d</i> <sub>6</sub> .....                         | 16 |

**Table S1.** Crystal Data for compound **1**

|                                      |                                                                                                                                                        |
|--------------------------------------|--------------------------------------------------------------------------------------------------------------------------------------------------------|
| Identification code                  | a_a                                                                                                                                                    |
| Empirical formula                    | C <sub>25</sub> H <sub>42</sub> O <sub>3</sub>                                                                                                         |
| Formula weight                       | 390.58                                                                                                                                                 |
| Temperature                          | 293(2) K                                                                                                                                               |
| Wavelength                           | 1.54178 Å                                                                                                                                              |
| Crystal system                       | Orthorhombic                                                                                                                                           |
| Space group                          | P2 <sub>1</sub> 2 <sub>1</sub> 2 <sub>1</sub>                                                                                                          |
| Unit cell dimensions                 | $a = 8.005 \text{ \AA}$ □ $\alpha = 90^\circ$ .<br>$b = 10.685 \text{ \AA}$ □ $\beta = 90^\circ$ .<br>$c = 26.893 \text{ \AA}$ □ $\gamma = 90^\circ$ . |
| Volume                               | 2300.3 Å <sup>3</sup>                                                                                                                                  |
| Z                                    | 4                                                                                                                                                      |
| Density (calculated)                 | 1.128 Mg/m <sup>3</sup>                                                                                                                                |
| Absorption coefficient               | 0.554 mm <sup>-1</sup>                                                                                                                                 |
| F(000)                               | 864                                                                                                                                                    |
| Crystal size                         | 0.180 x 0.150 x 0.120 mm <sup>3</sup>                                                                                                                  |
| Theta range for data collection      | 5.287 to 68.440°.                                                                                                                                      |
| Index ranges                         | -9 ≤ h ≤ 9, -12 ≤ k ≤ 12, -32 ≤ l ≤ 32                                                                                                                 |
| Reflections collected                | 28454                                                                                                                                                  |
| Independent reflections              | 4211 [ $R_{int} = 0.0360$ ]                                                                                                                            |
| Completeness to theta = 67.679°      | 99.7 %                                                                                                                                                 |
| Refinement method                    | Full-matrix least-squares on $F^2$                                                                                                                     |
| Data / restraints / parameters       | 4221 / 2 / 260                                                                                                                                         |
| Goodness-of-fit on $F^2$             | 1.066                                                                                                                                                  |
| Final R indices [ $I > 2\sigma(I)$ ] | $R_1 = 0.0867$ , $wR_2 = 0.2500$                                                                                                                       |
| R indices (all data)                 | $R_1 = 0.0900$ , $wR_2 = 0.2563$                                                                                                                       |
| Absolute structure parameter         | 0.1(5)                                                                                                                                                 |
| Extinction coefficient               | n/a                                                                                                                                                    |
| Largest diff. peak and hole          | 1.061 and -0.577 e.Å <sup>-3</sup>                                                                                                                     |

**Table S2.** Crystal Data for compound **2**

|                                      |                                                                                                                                                                                         |
|--------------------------------------|-----------------------------------------------------------------------------------------------------------------------------------------------------------------------------------------|
| Identification code                  | a                                                                                                                                                                                       |
| Empirical formula                    | C <sub>25</sub> H <sub>42</sub> O <sub>3</sub>                                                                                                                                          |
| Formula weight                       | 390.58                                                                                                                                                                                  |
| Temperature                          | 295(2) K                                                                                                                                                                                |
| Wavelength                           | 1.54178 Å                                                                                                                                                                               |
| Crystal system                       | Triclinic                                                                                                                                                                               |
| Space group                          | P1                                                                                                                                                                                      |
| Unit cell dimensions                 | $a = 7.9393(3) \text{ \AA}$ □ $\alpha = 86.790(2)^\circ$ .<br>$b = 12.0041(5) \text{ \AA}$ □ $\beta = 89.802(2)^\circ$ .<br>$c = 12.3904(5) \text{ \AA}$ □ $\gamma = 73.896(2)^\circ$ . |
| Volume                               | 1132.65(8) Å <sup>3</sup>                                                                                                                                                               |
| Z                                    | 2                                                                                                                                                                                       |
| Density (calculated)                 | 1.145 Mg/m <sup>3</sup>                                                                                                                                                                 |
| Absorption coefficient               | 0.563 mm <sup>-1</sup>                                                                                                                                                                  |
| F(000)                               | 432                                                                                                                                                                                     |
| Crystal size                         | 0.200 x 0.180 x 0.140 mm <sup>3</sup>                                                                                                                                                   |
| Theta range for data collection      | 3.839 to 68.364°.                                                                                                                                                                       |
| Index ranges                         | -9<=h<=9, -14<=k<=14, -14<=l<=14                                                                                                                                                        |
| Reflections collected                | 14451                                                                                                                                                                                   |
| Independent reflections              | 7466 [ $R(int) = 0.0534$ ]                                                                                                                                                              |
| Completeness to theta = 67.679°      | 97.6 %                                                                                                                                                                                  |
| Refinement method                    | Full-matrix least-squares on $F^2$                                                                                                                                                      |
| Data / restraints / parameters       | 7466 / 3 / 521                                                                                                                                                                          |
| Goodness-of-fit on $F^2$             | 1.087                                                                                                                                                                                   |
| Final R indices [ $I > 2\sigma(I)$ ] | $R_1 = 0.0701$ , $wR_2 = 0.2320$                                                                                                                                                        |
| R indices (all data)                 | $R_1 = 0.0830$ , $wR_2 = 0.2412$                                                                                                                                                        |
| Absolute structure parameter         | 0.05(12)                                                                                                                                                                                |
| Extinction coefficient               | n/a                                                                                                                                                                                     |
| Largest diff. peak and hole          | 0.321 and -0.214 e.Å <sup>-3</sup>                                                                                                                                                      |

**Table S3.** Crystal Data for compounds **3** and **4**

|                                      |                                                                                                                                                              |
|--------------------------------------|--------------------------------------------------------------------------------------------------------------------------------------------------------------|
| Identification code                  | 190225b                                                                                                                                                      |
| Empirical formula                    | C <sub>9</sub> H <sub>12</sub> O <sub>4</sub>                                                                                                                |
| Formula weight                       | 184.19                                                                                                                                                       |
| Temperature                          | 295(2) K                                                                                                                                                     |
| Wavelength                           | 1.54178 Å                                                                                                                                                    |
| Crystal system                       | Triclinic                                                                                                                                                    |
| Space group                          | P1                                                                                                                                                           |
| Unit cell dimensions                 | $a = 5.5136(4)$ Å □ $\alpha = 78.4590(10)^\circ$ .<br>$b = 7.5778(6)$ Å □ $\beta = 82.801(2)^\circ$ .<br>$c = 11.5822(9)$ Å □ $\gamma = 77.4670(10)^\circ$ . |
| Volume                               | 461.13(6) Å <sup>3</sup>                                                                                                                                     |
| Z                                    | 2                                                                                                                                                            |
| Density (calculated)                 | 1.327 Mg/m <sup>3</sup>                                                                                                                                      |
| Absorption coefficient               | 0.882 mm <sup>-1</sup>                                                                                                                                       |
| F(000)                               | 196                                                                                                                                                          |
| Crystal size                         | 0.36 x 0.18 x 0.10 mm <sup>3</sup>                                                                                                                           |
| Theta range for data collection      | 6.08 to 65.96°.                                                                                                                                              |
| Index ranges                         | -6 ≤ h ≤ 5, -8 ≤ k ≤ 7, -13 ≤ l ≤ 12                                                                                                                         |
| Reflections collected                | 2488                                                                                                                                                         |
| Independent reflections              | 1855 [ $R(int) = 0.0525$ ]                                                                                                                                   |
| Completeness to theta = 67.679°      | 98.1 %                                                                                                                                                       |
| Refinement method                    | Full-matrix least-squares on $F^2$                                                                                                                           |
| Data / restraints / parameters       | 1855 / 3 / 240                                                                                                                                               |
| Goodness-of-fit on $F^2$             | 1.052                                                                                                                                                        |
| Final R indices [ $I > 2\sigma(I)$ ] | $R_1 = 0.0688$ , $wR_2 = 0.1576$                                                                                                                             |
| R indices (all data)                 | $R_1 = 0.1001$ , $wR_2 = 0.1778$                                                                                                                             |
| Absolute structure parameter         | 0.0(9)                                                                                                                                                       |
| Extinction coefficient               | 0.035(4)                                                                                                                                                     |
| Largest diff. peak and hole          | 0.274 and -0.300 e.Å <sup>-3</sup>                                                                                                                           |

Figure S1.  $^1\text{H}$  NMR Spectrum (500 MHz) of compound **1** in  $\text{CDCl}_3$

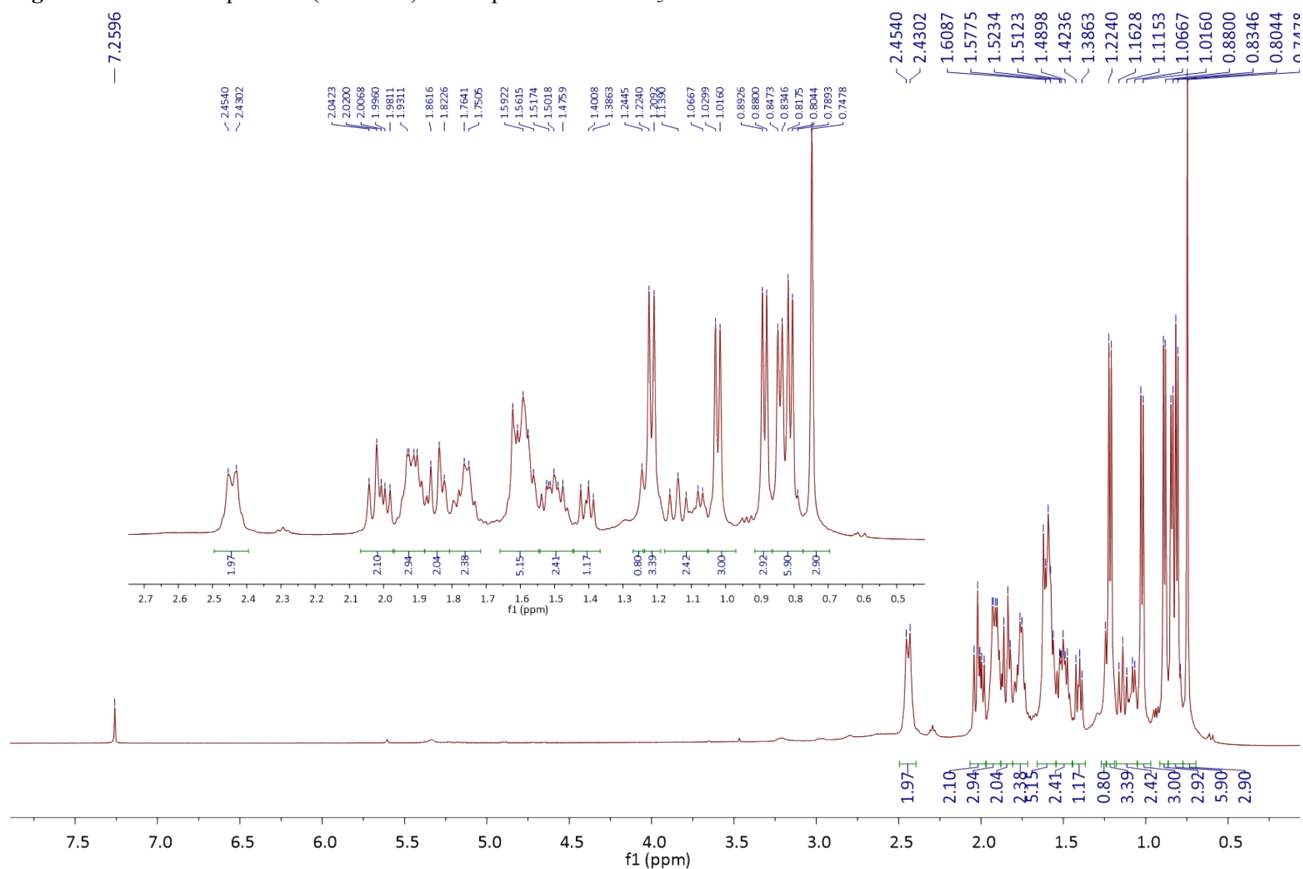

Figure S2.  $^{13}\text{C}$  NMR Spectrum (125 MHz) of compound **1** in  $\text{CDCl}_3$

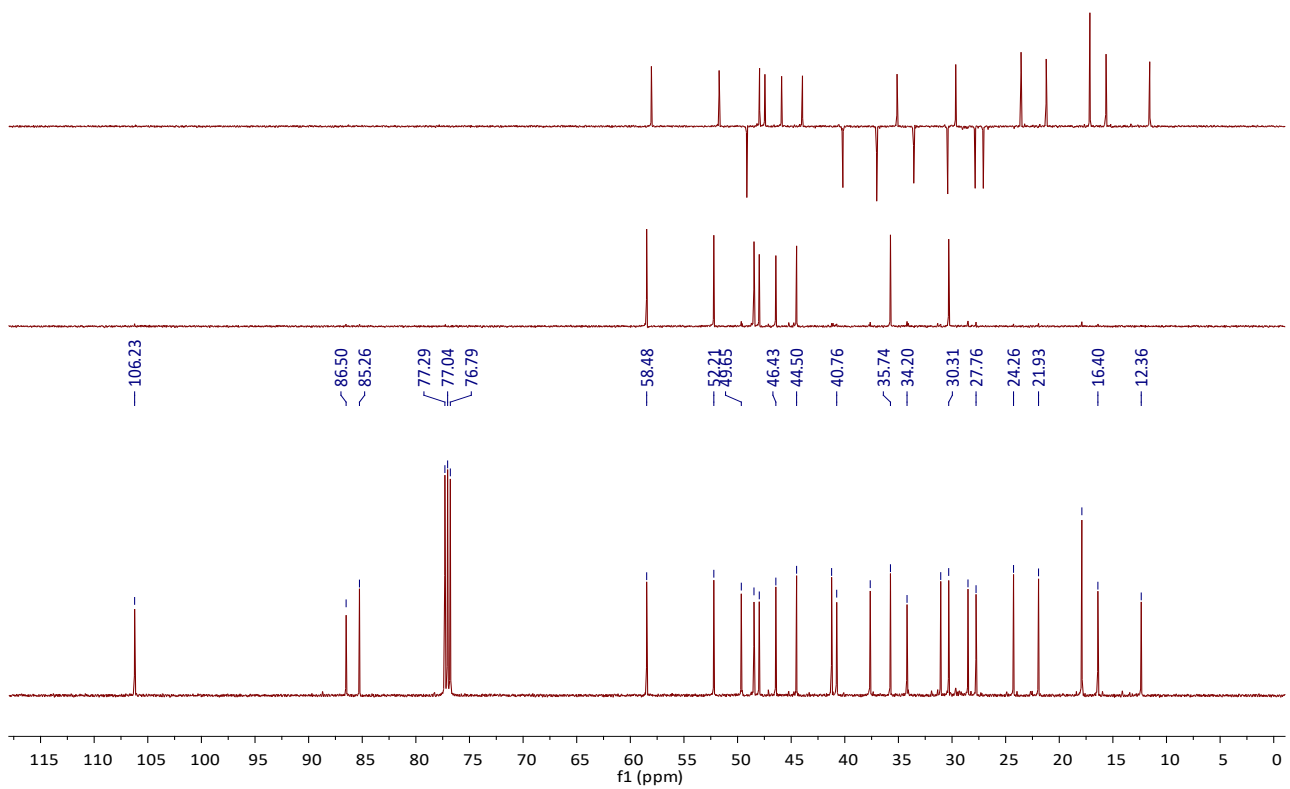

Figure S3. COSY Spectrum of compound **1** in CDCl<sub>3</sub>

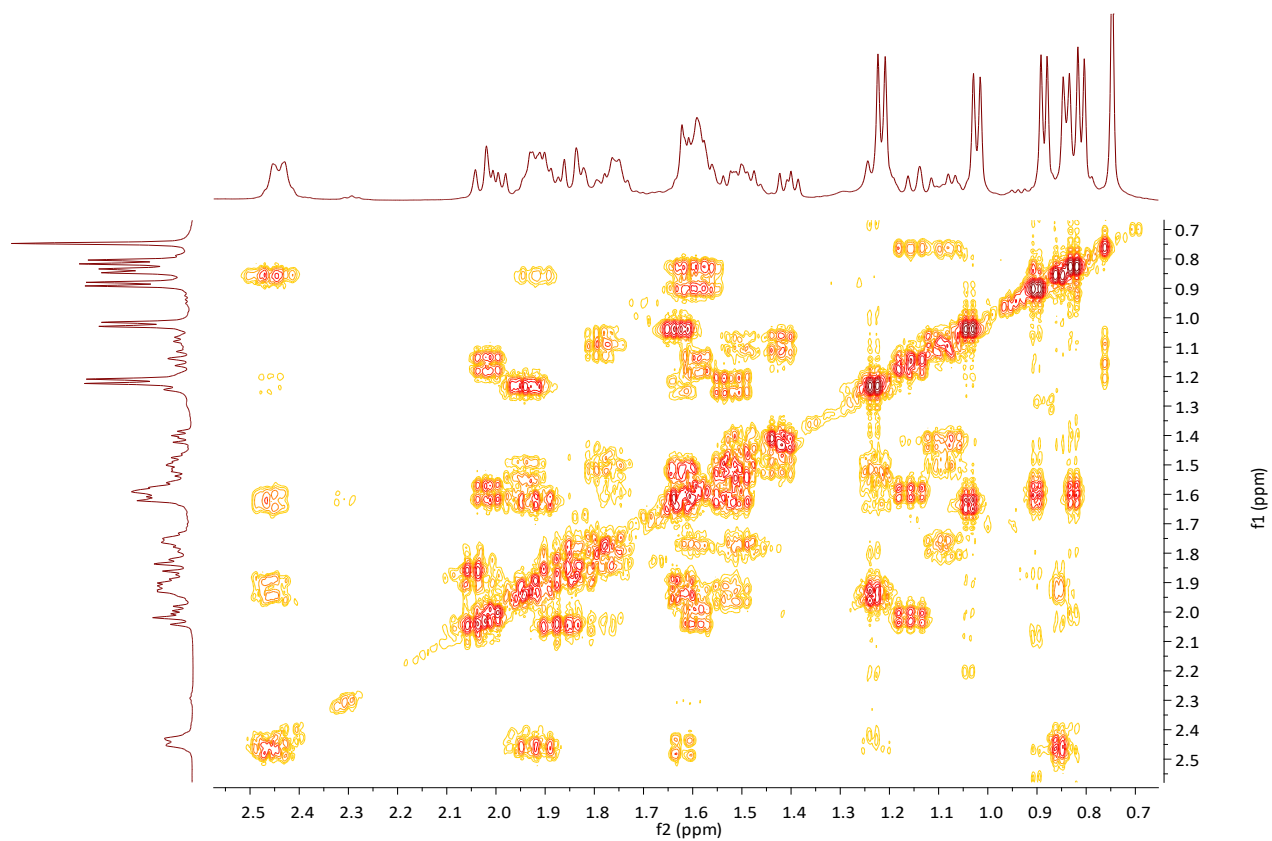

Figure S4. HSQC Spectrum of compound **1** in CDCl<sub>3</sub>

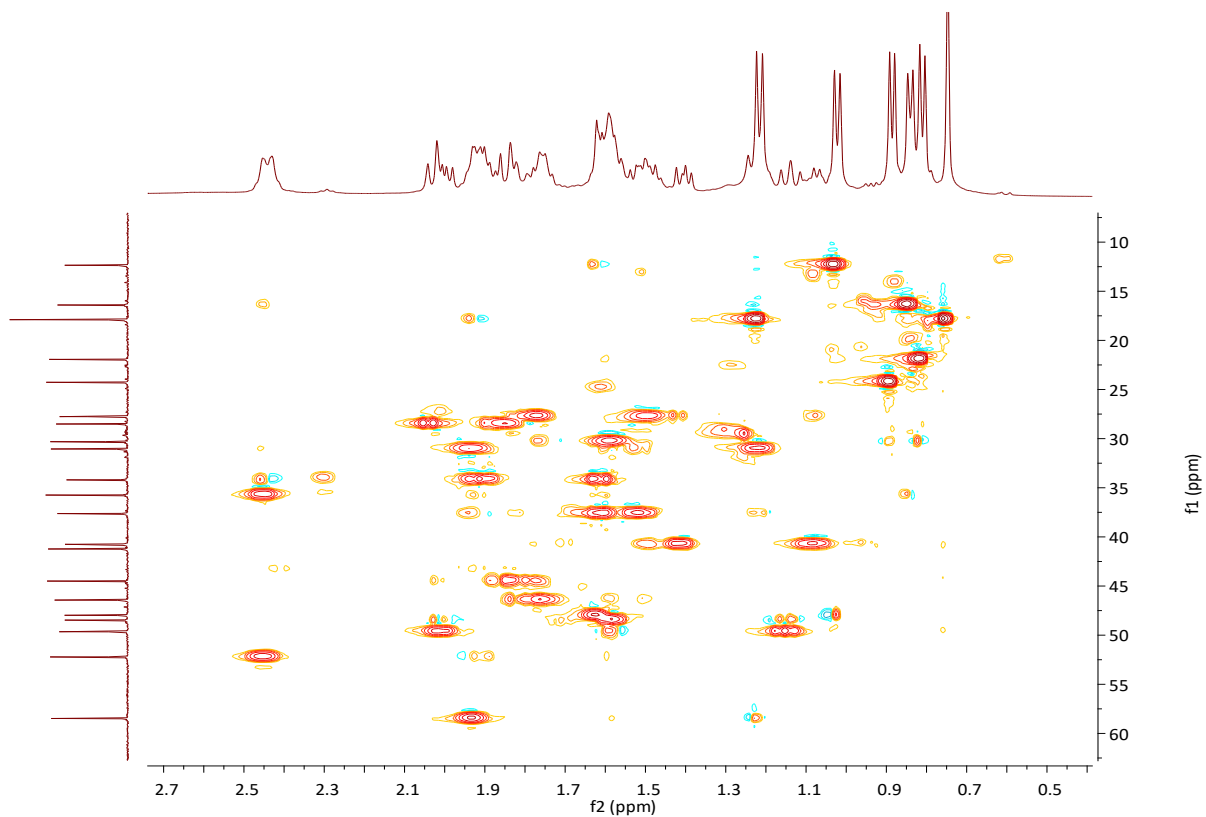

Figure S5. HMBC Spectrum of compound **1** in CDCl<sub>3</sub>

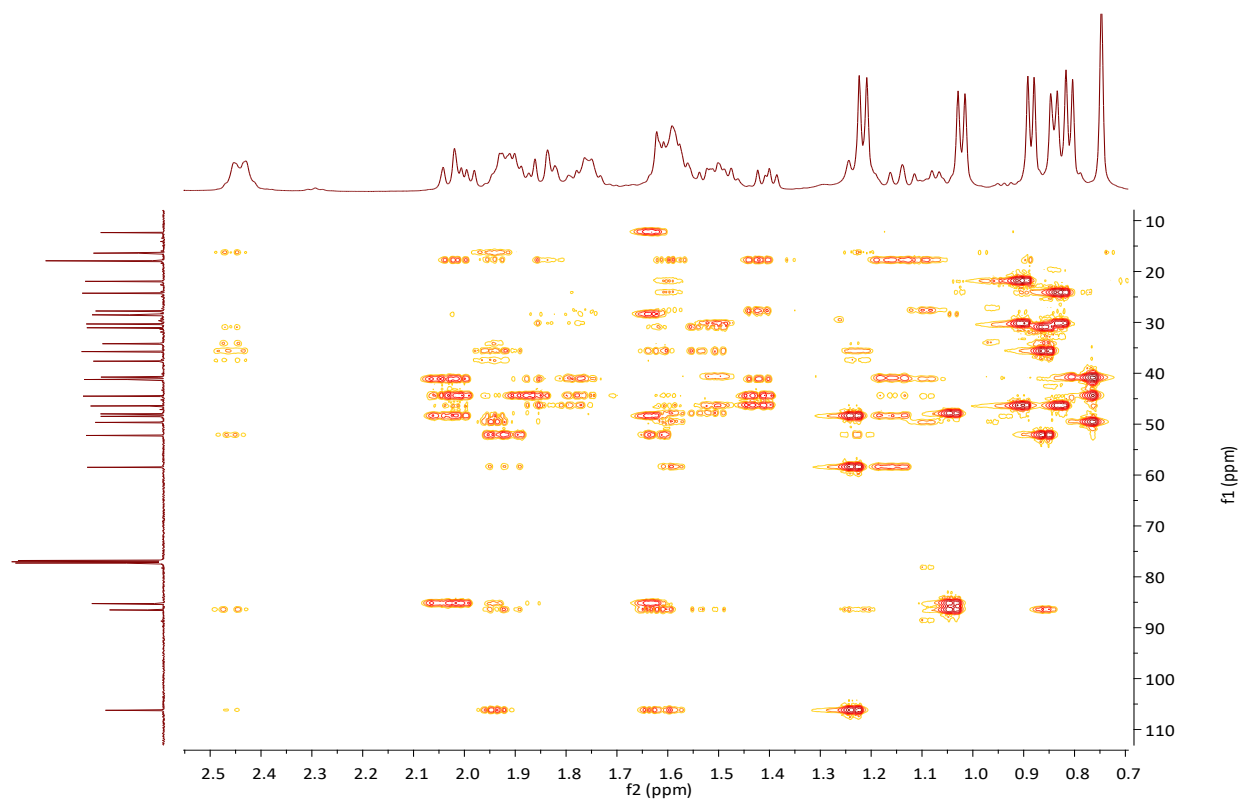

Figure S6. NOESY Spectrum of compound **1** in CDCl<sub>3</sub>

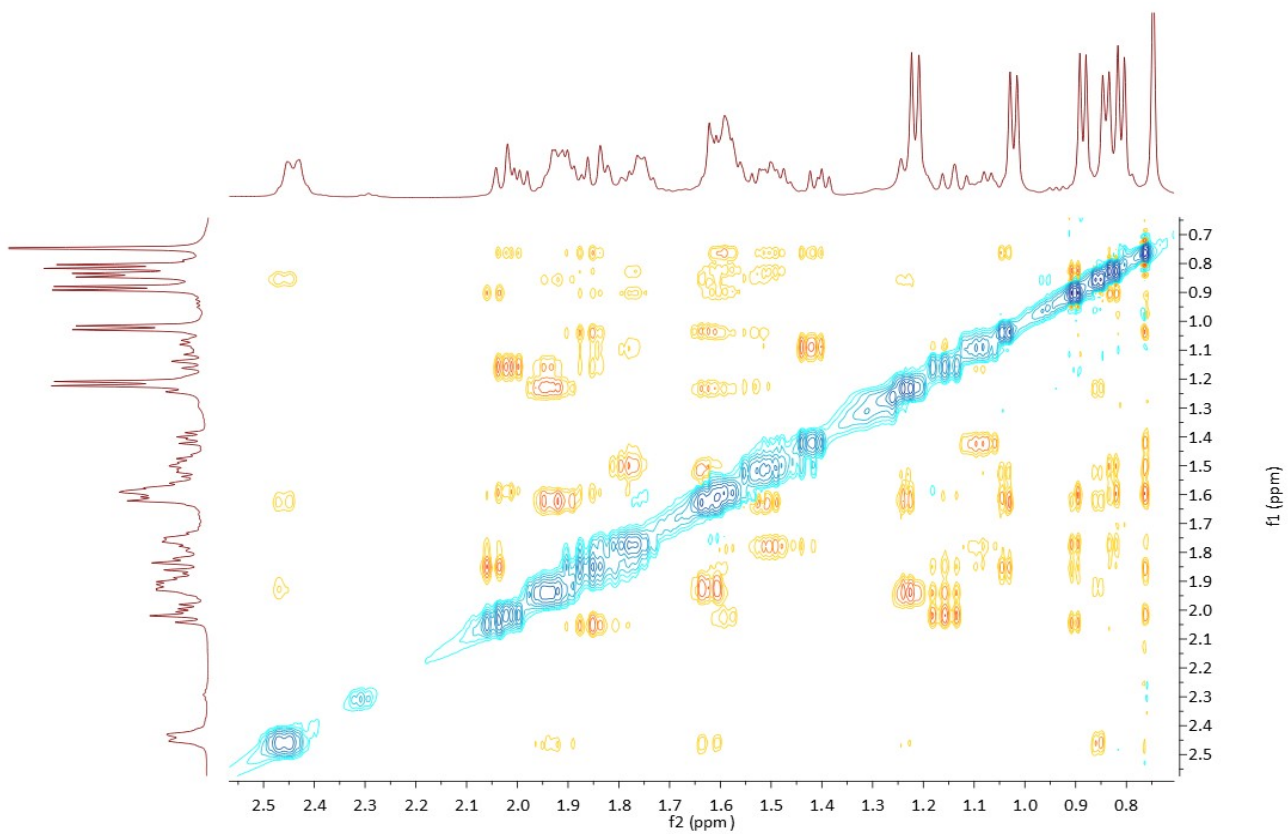





Figure S9.  $^{13}\text{C}$  NMR Spectrum (125 MHz) of compound **2** in  $\text{CDCl}_3$

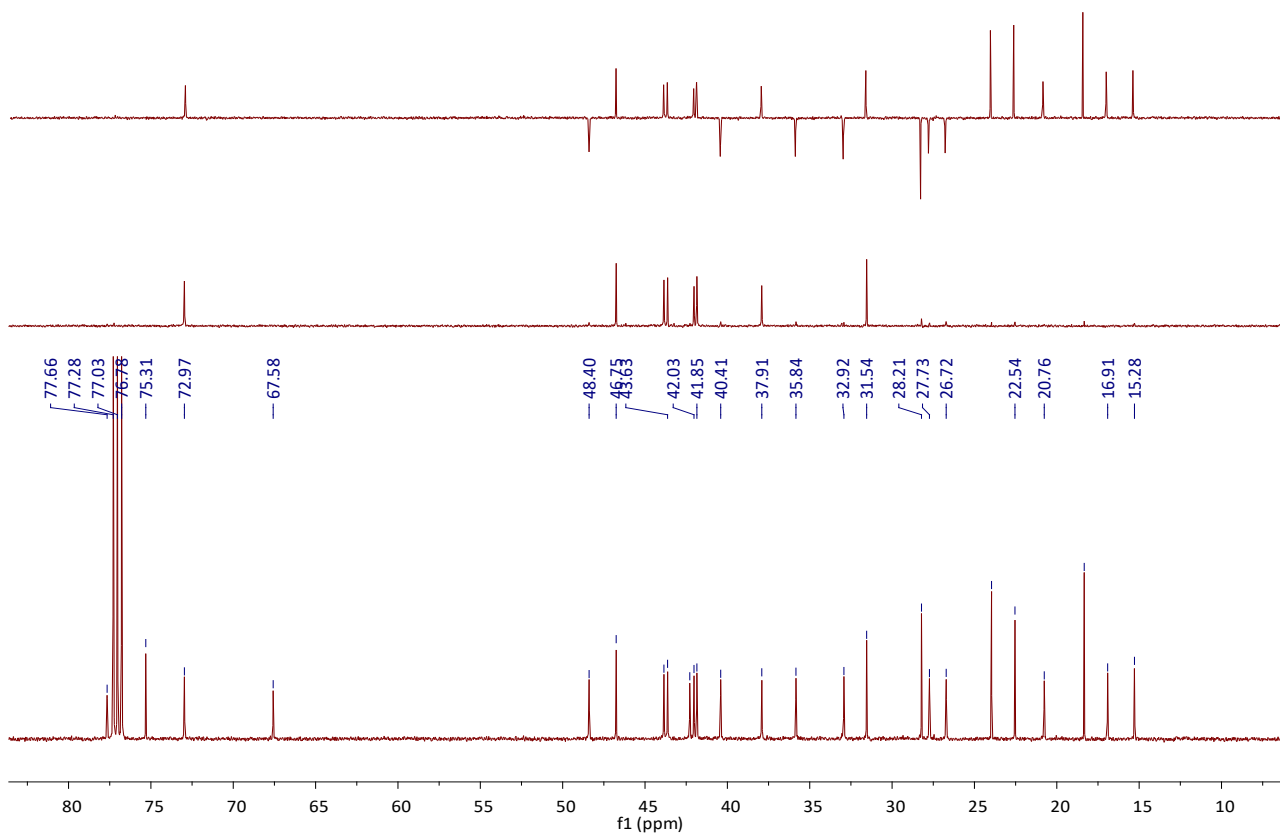

Figure S10. COSY Spectrum of compound **2** in  $\text{CDCl}_3$

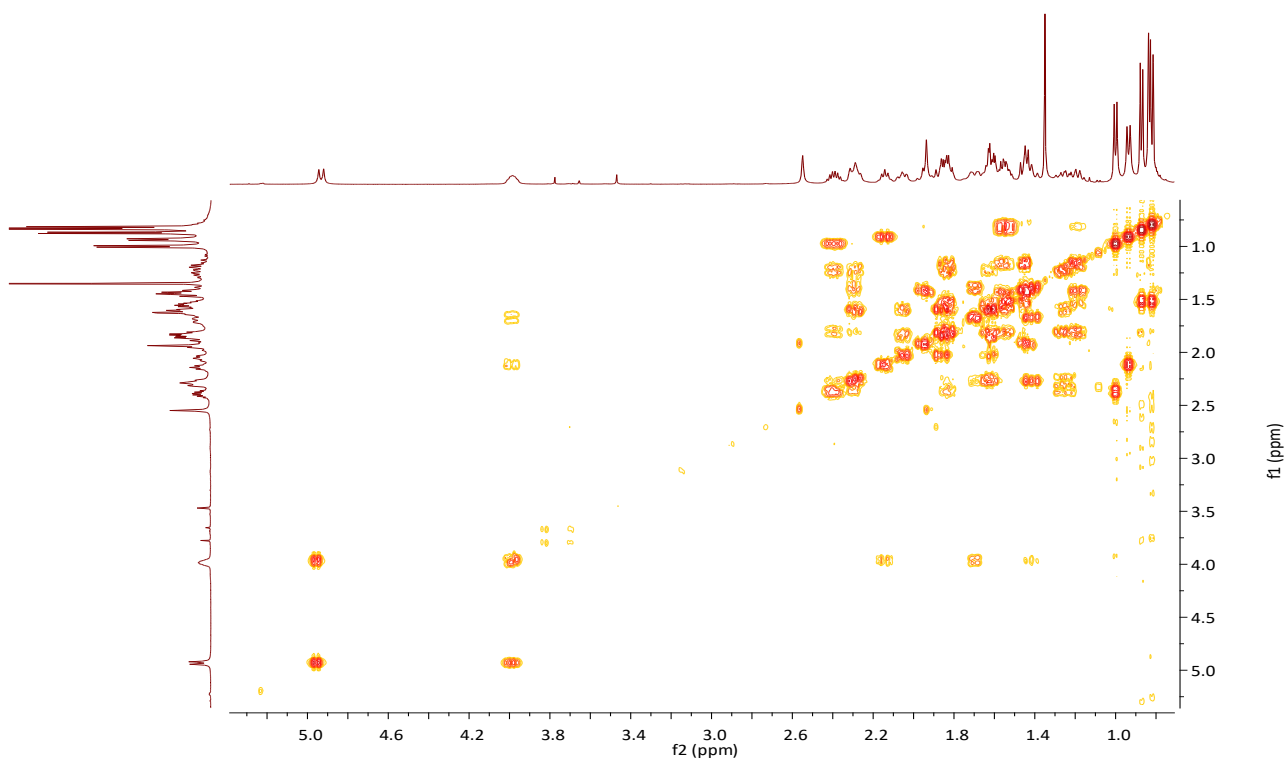

Figure S11. HSQC Spectrum of compound 2 in CDCl<sub>3</sub>

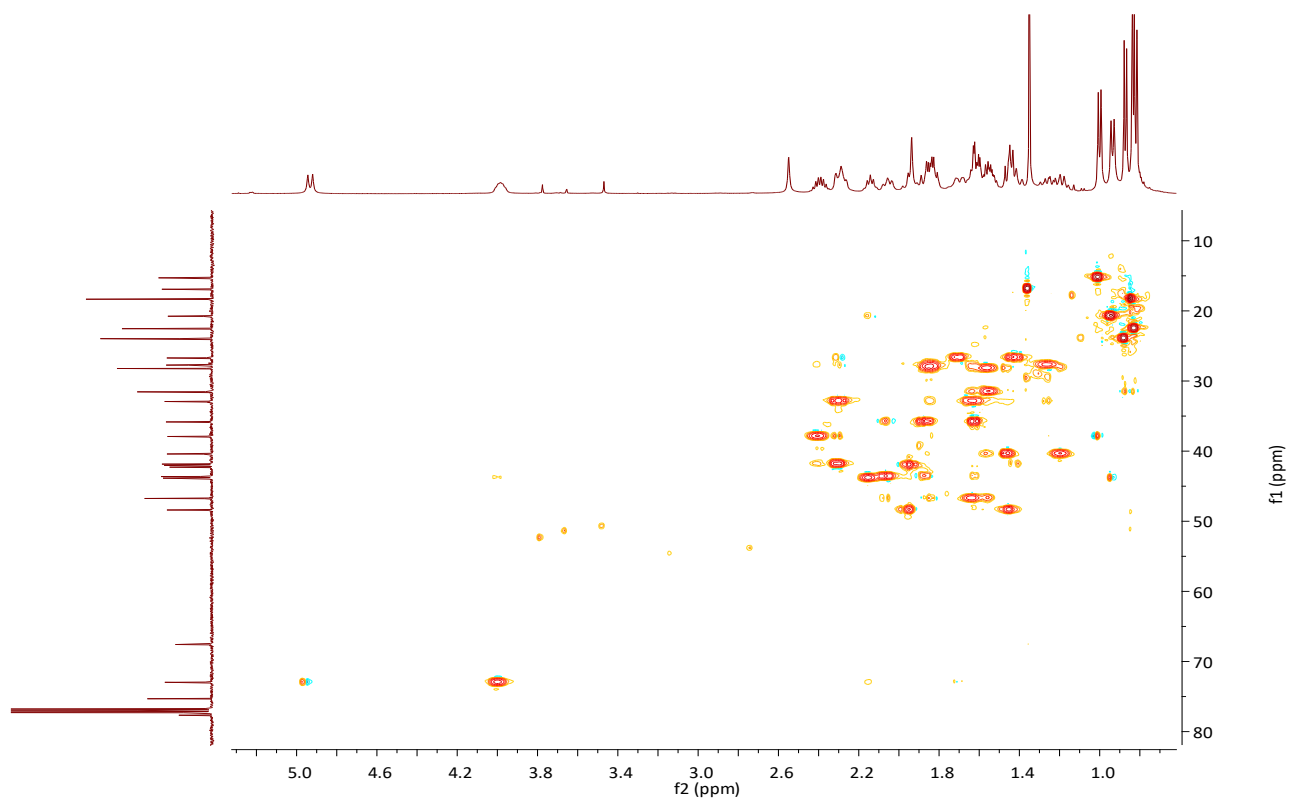

Figure S12. HMBC Spectrum of compound 2 in CDCl<sub>3</sub>

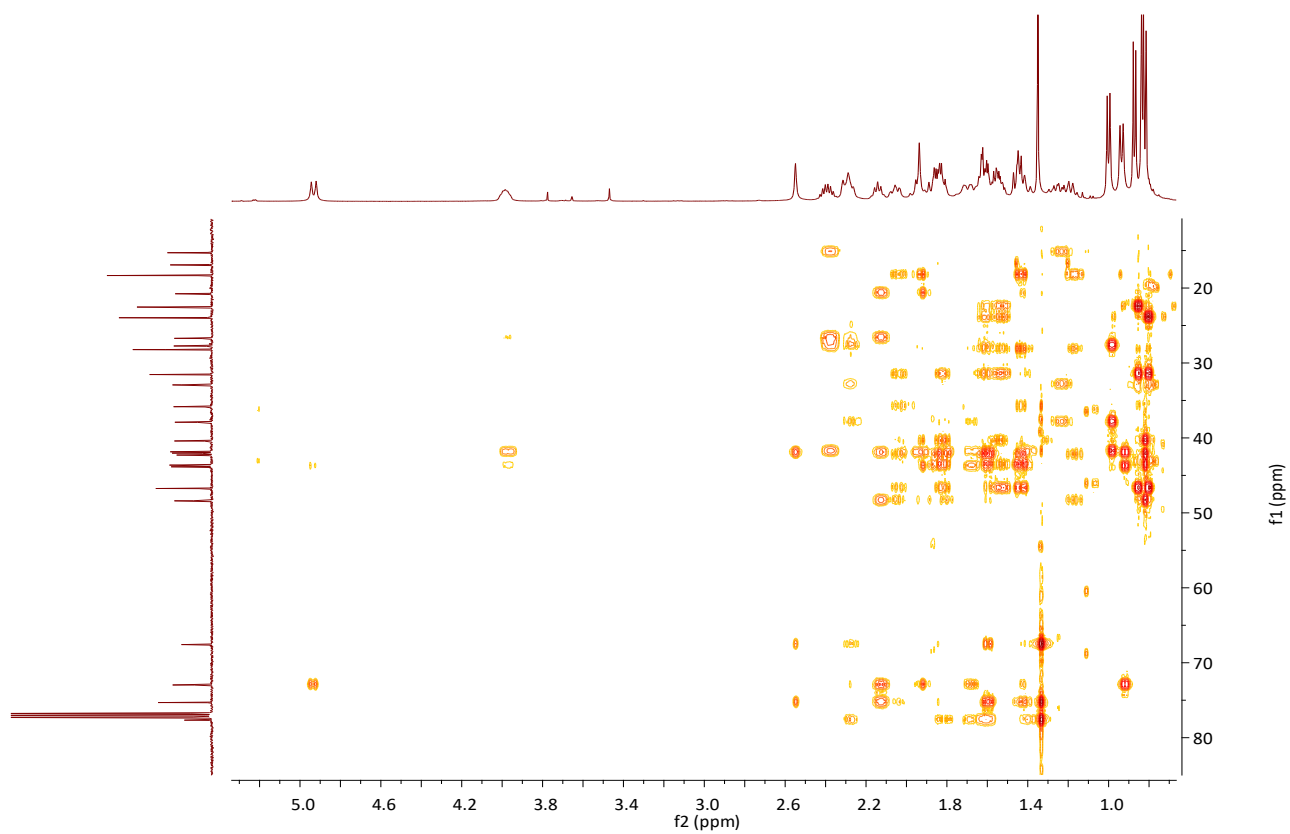

Figure S13. NOESY Spectrum of compound 2 in CDCl<sub>3</sub>

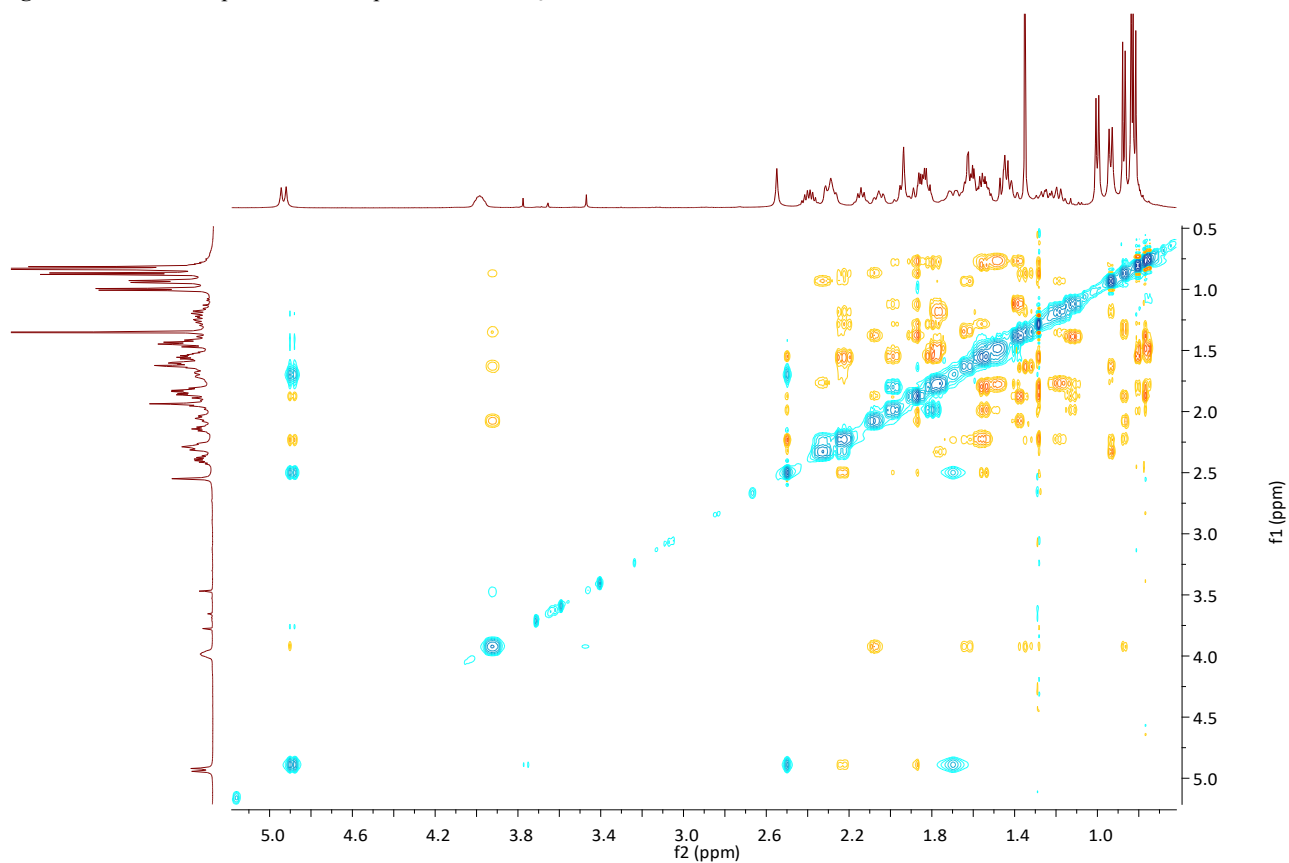

Figure S14. HRESIMS Spectrum of compound 2

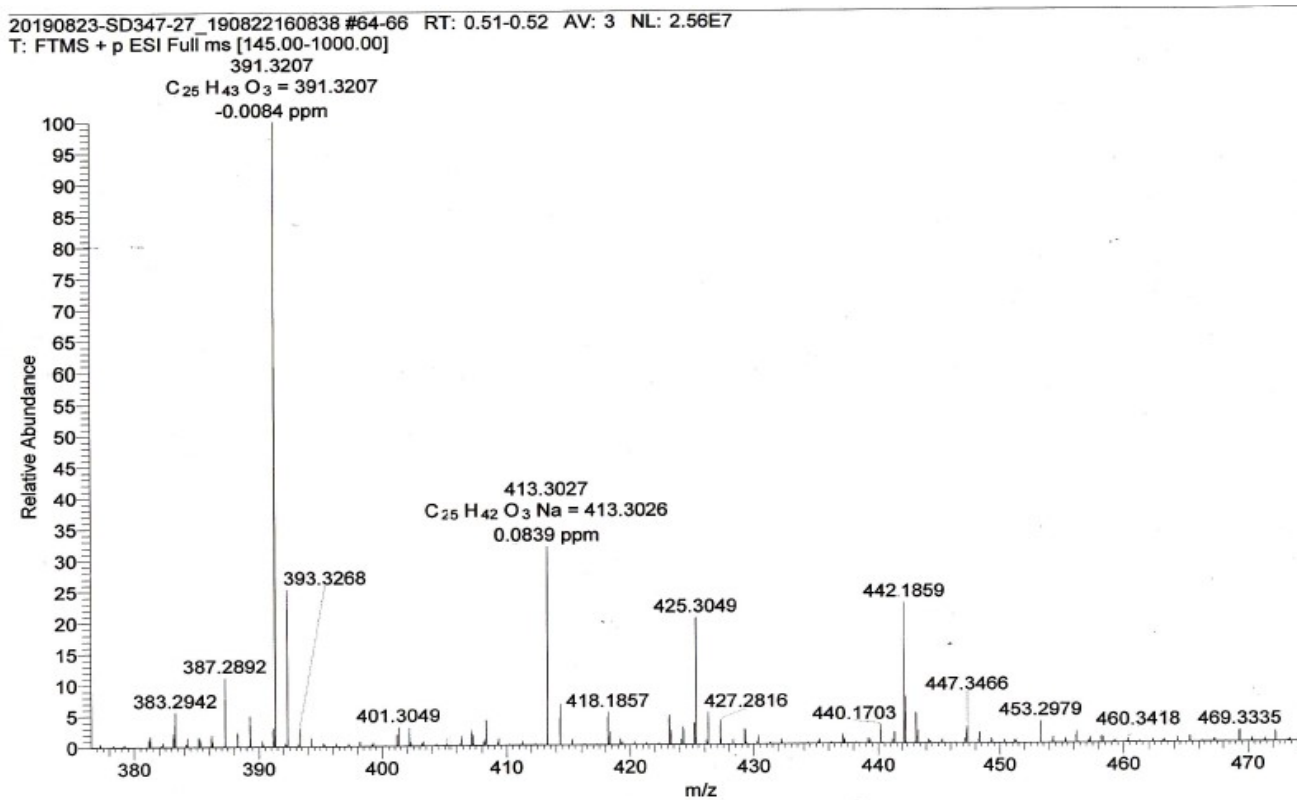

Figure S15. <sup>1</sup>H NMR Spectrum (500 MHz) of compounds **3** and **4** in DMSO-*d*<sub>6</sub>

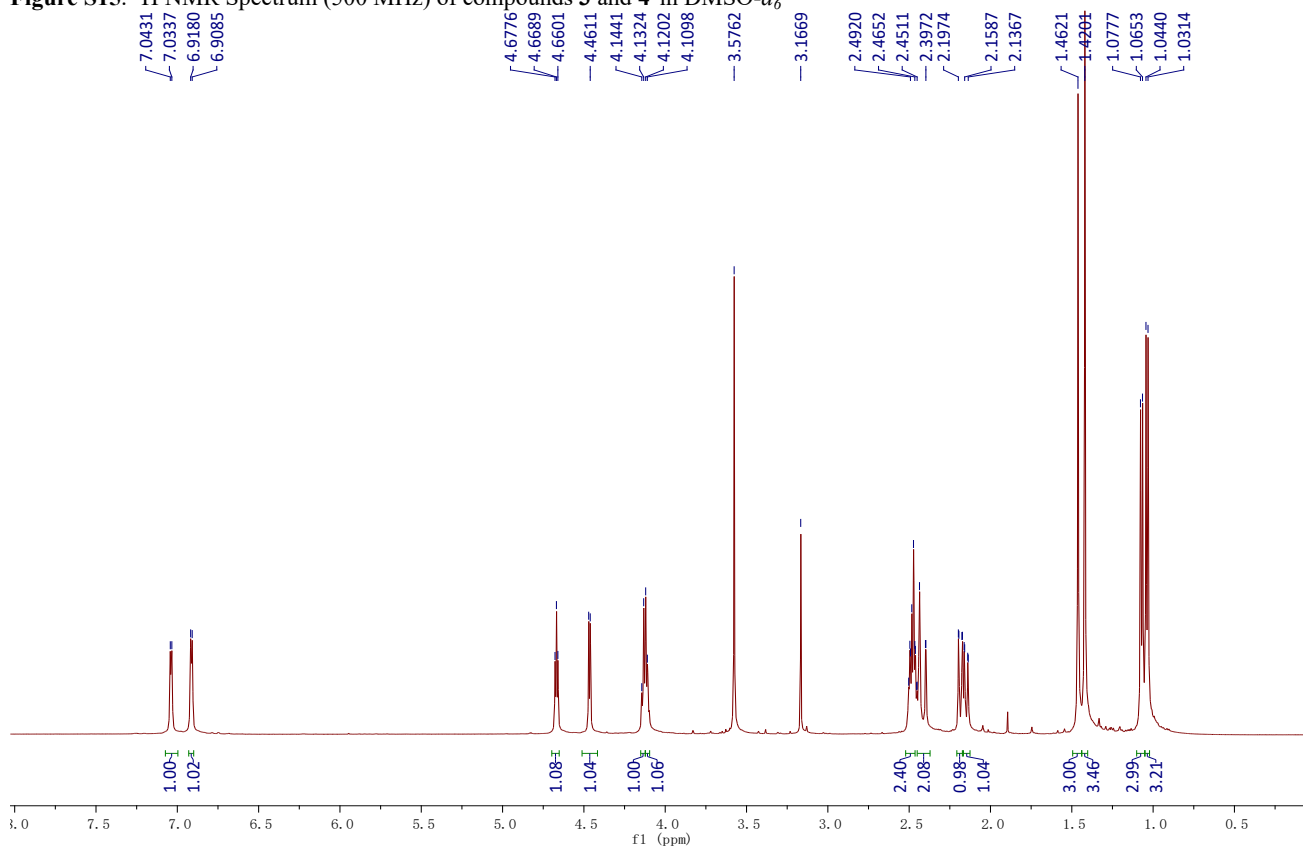

Figure S16. <sup>13</sup>C NMR Spectrum (125 MHz) of compounds **3** and **4** in DMSO-*d*<sub>6</sub>

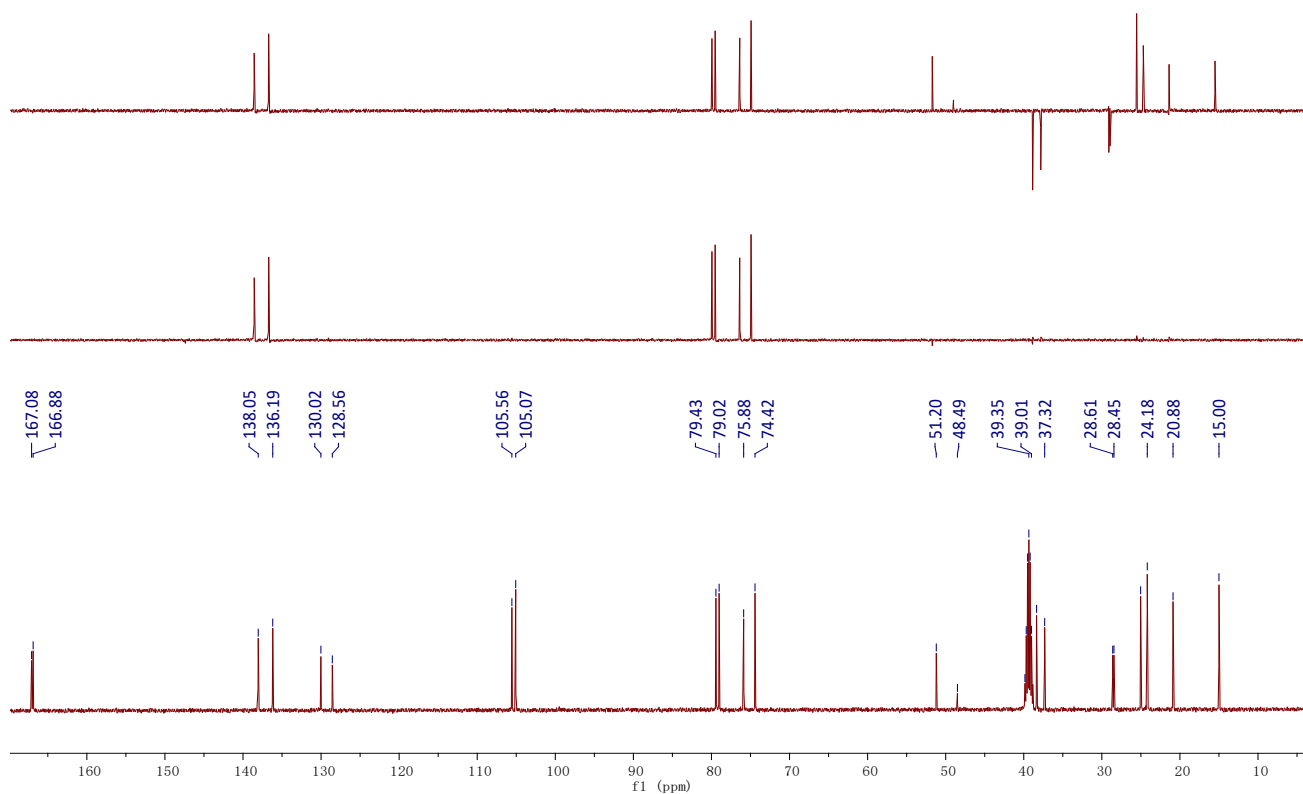

Figure S17. COSY Spectrum of compounds **3** and **4** in DMSO- $d_6$

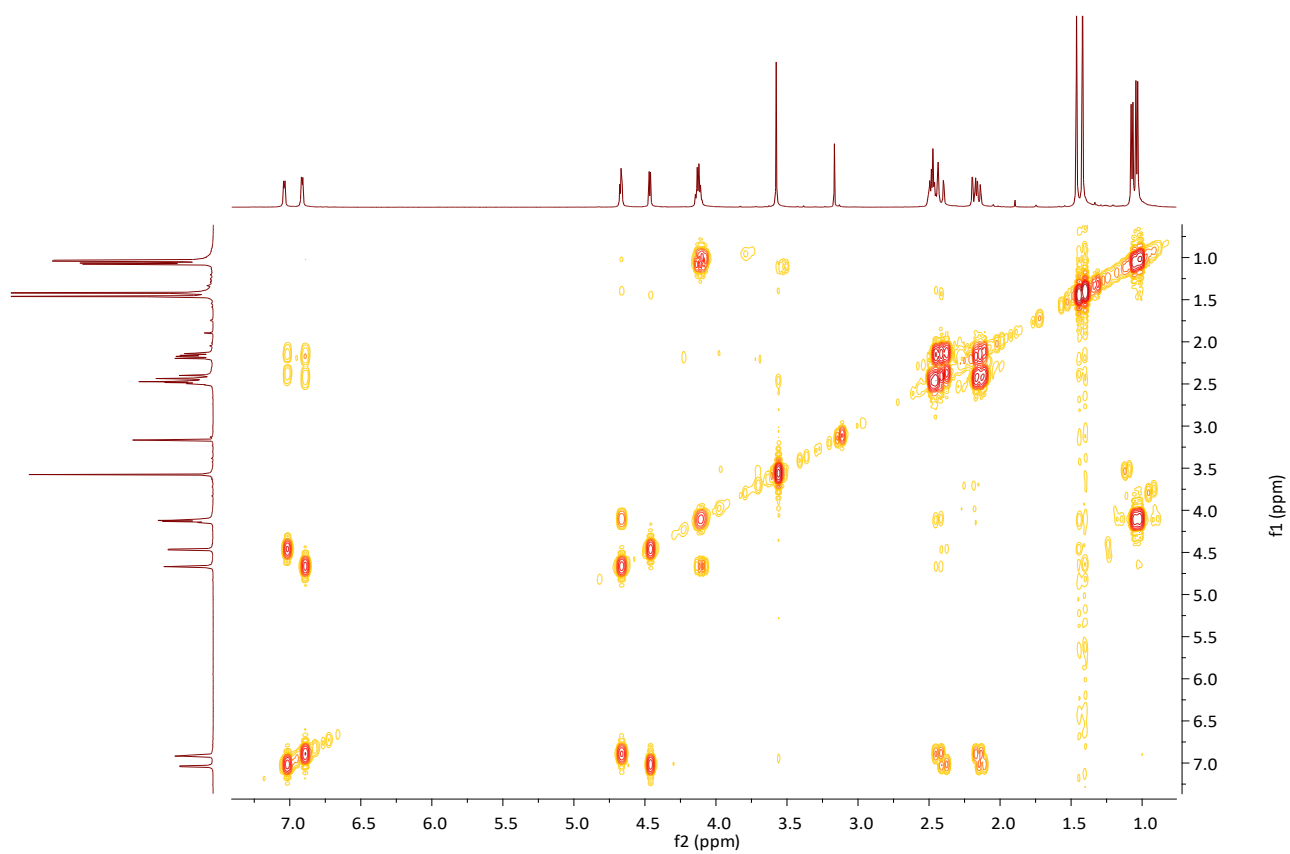

Figure S18. HSQC Spectrum of compounds **3** and **4** in DMSO- $d_6$

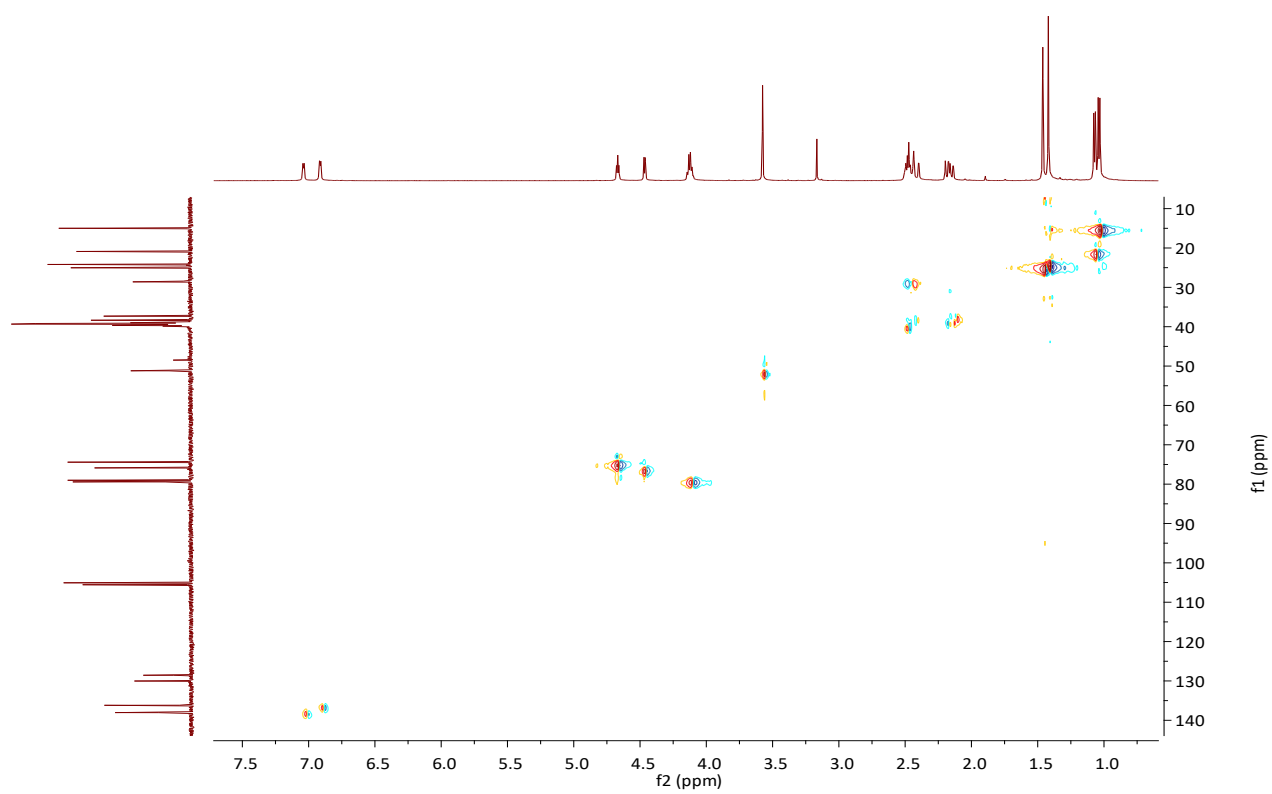

Figure S19. HMBC Spectrum of compounds **3** and **4** in DMSO- $d_6$

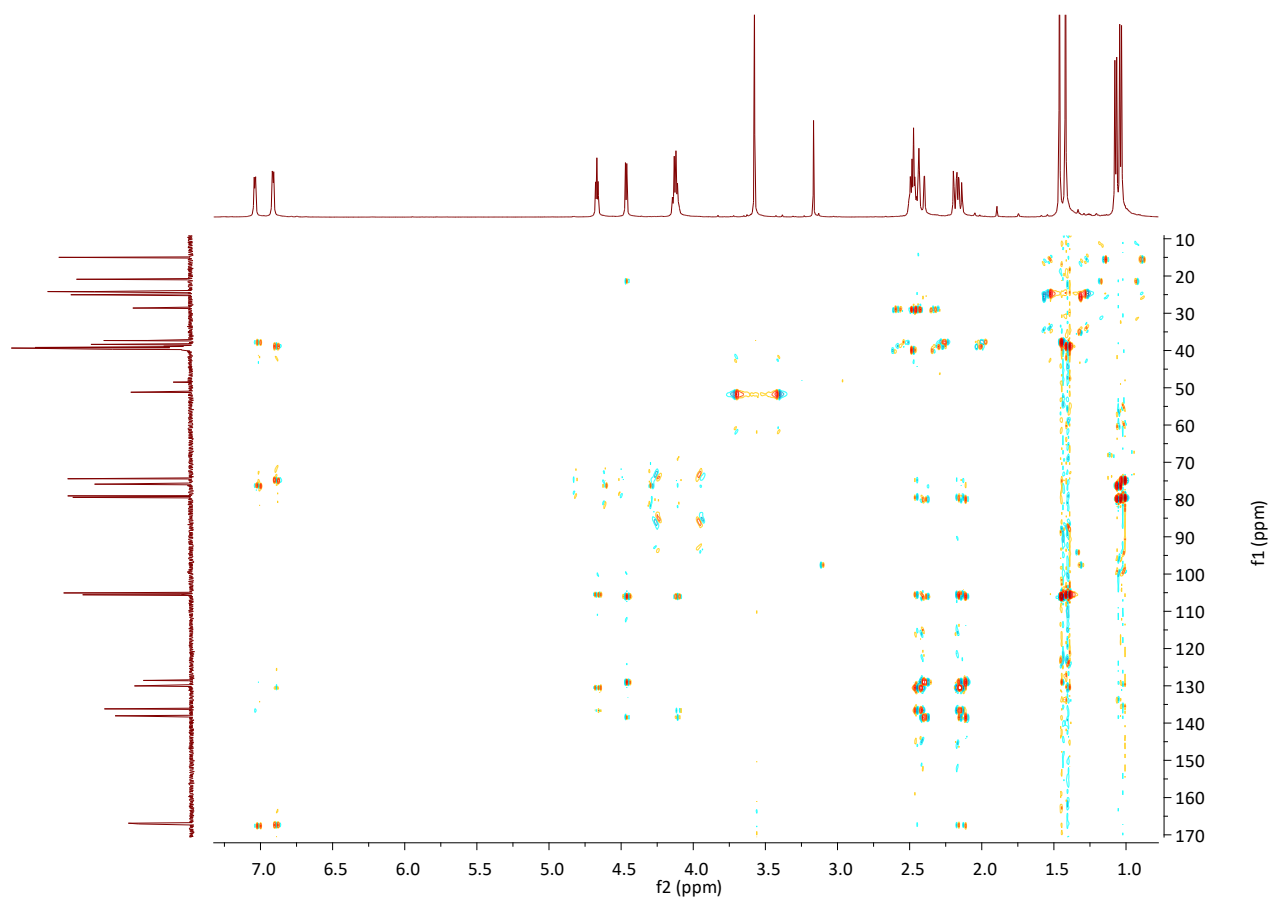

Figure S20. NOESY Spectrum of compounds **3** and **4** in DMSO- $d_6$

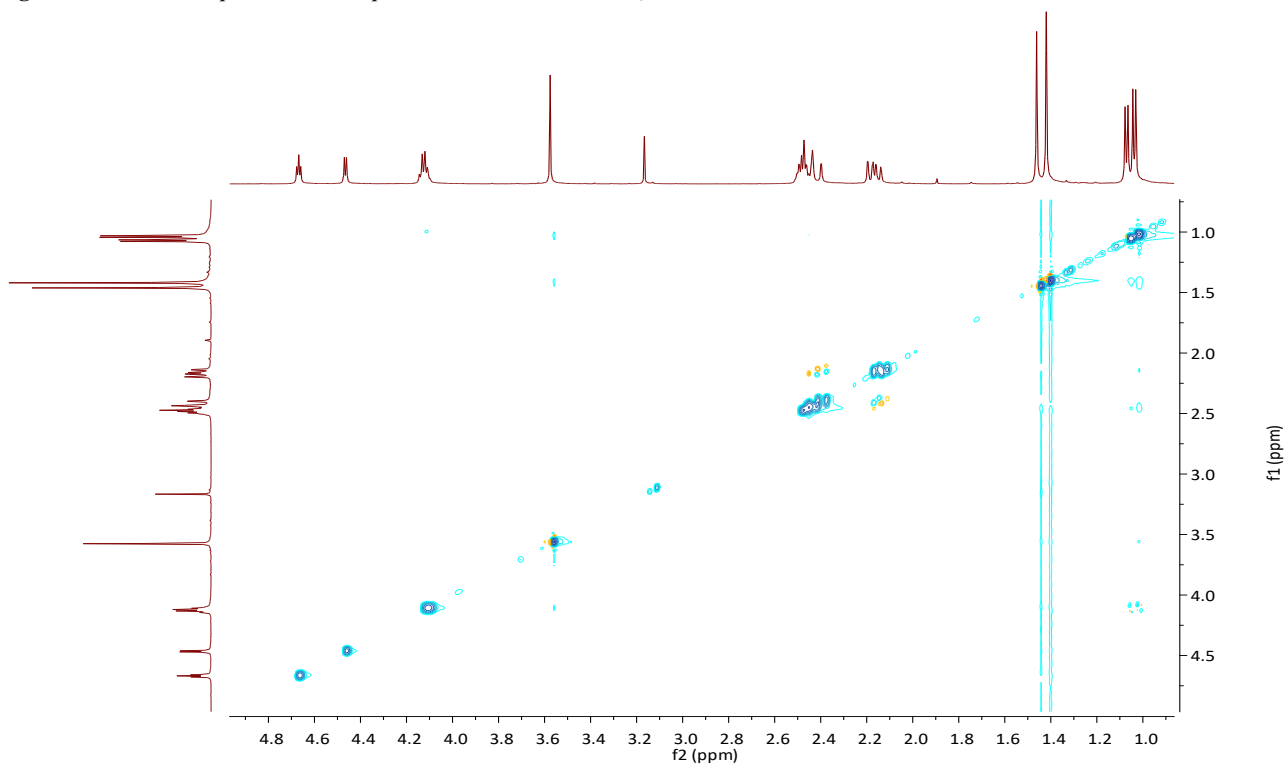

Figure S20. HRESIMS Spectrum of compounds 3 and 4

90823-SD347-1\_190822160838 #119-120 RT: 0.95-0.95 AV: 2 NL: 3.62E6  
TMS + p ESI Full ms [100.00-1000.00]

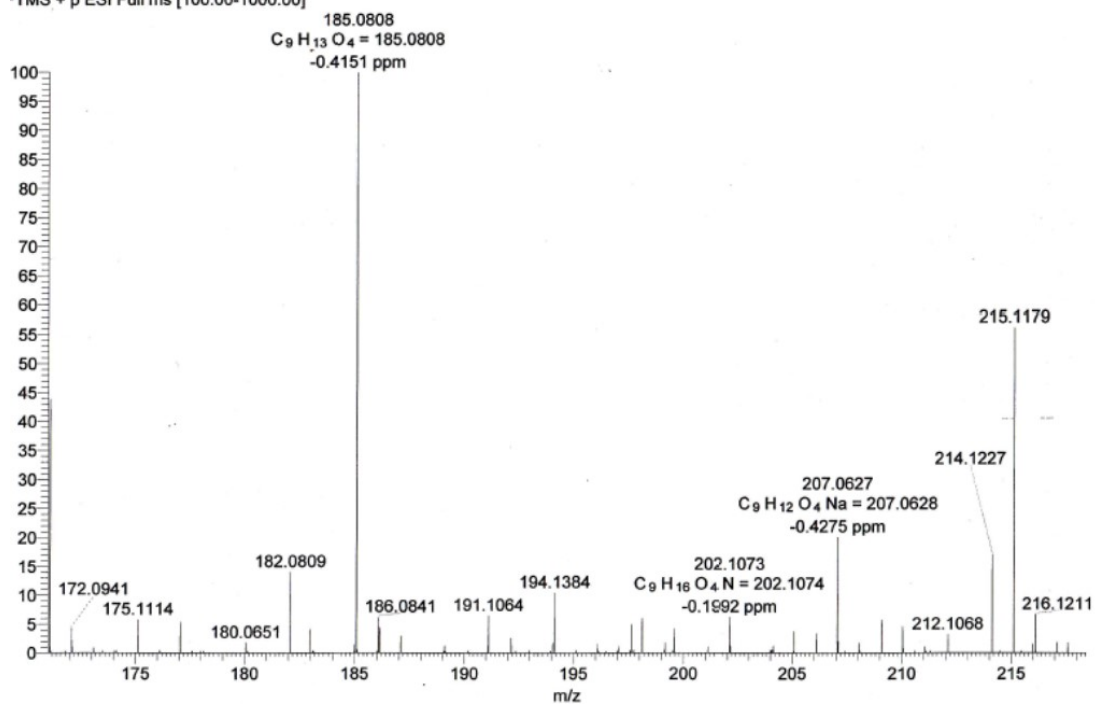

Supplement: d4ob00449c1.pdf [file d4ob00449c1.pdf]
